# Supplementary material for: Phosphorylation-dependent routing of RLP44 towards brassinosteroid or phytosulfokine signalling
Source: PubMed Central journal article supplement (PMC8572011; doi:10.1242/jcs.259134), 2021-10-20
Supplement: joces-134-259134-s1.pdf [file joces-134-259134-s1.pdf]

**A** AtRLP44\_GFP (100%), 58,037.7 Da  
 AtRLP44\_GFP  
 2 exclusive unique peptides, 5 exclusive unique spectra, 255 total spectra, 293/523 amino acids (56% coverage)

|             |             |            |            |            |
|-------------|-------------|------------|------------|------------|
| MTRSHRLLLL  | LLLIFQTAQR  | LTTADPNDEA | CLKNLRQNLE | DPASNLRNWT |
| NSVFSNPPCSG | FTSYLPGATC  | NNGRIYKLSL | TNLSLRGSIS | PFLSNCTNLQ |
| SLDLSSNQIS  | GVIPPEIQYL  | VNLAVLNLSS | NHLSGEITPQ | LALCAYLNVI |
| DLHDNELSGQ  | IQPQLGLLAR  | LSAFDVSNNK | LSGQIPTYLS | NRTGNFPRFN |
| ASSFIGNKGL  | YGYPLQEMMM  | KSKGLSVMAI | VGIGLGSGLA | SLMISFTGVC |
| LWLRITEKKI  | VEEEEGKISQS | MPDYPAFLYK | VVISMVSKGE | ELFTGVVPII |
| VELDGDVNGH  | KFSVSGEGEG  | DATYGLTLTK | FICTTGKLPV | PWPTLVTTLT |
| YGVQCFSTRYP | DHMKQHDFFK  | SAMPEGYVQE | RTIFFKDDGN | YKTRAEVKFE |
| GDTLVNRIEL  | KGIDFKEDGN  | ILGHKLEYNY | NSHNVYIMAD | KQKNGIKVNF |
| KIRHNIEDGS  | VQLADHYQQN  | TPIGDGPVLL | PDNHVLSLTS | ALSKDPNEKR |
| DHMLVLEFVT  | AAGITLGMDE  | LYK        |            |            |

**B** (K)IVEEEGKISQMPDYPAFLYk(V)

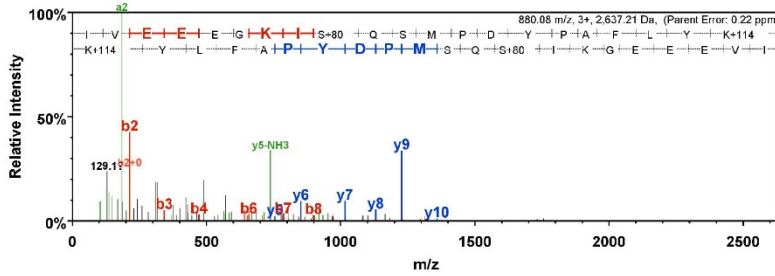

**C** (K)IVEEEGKISQSmPDYPAFLYK(V)

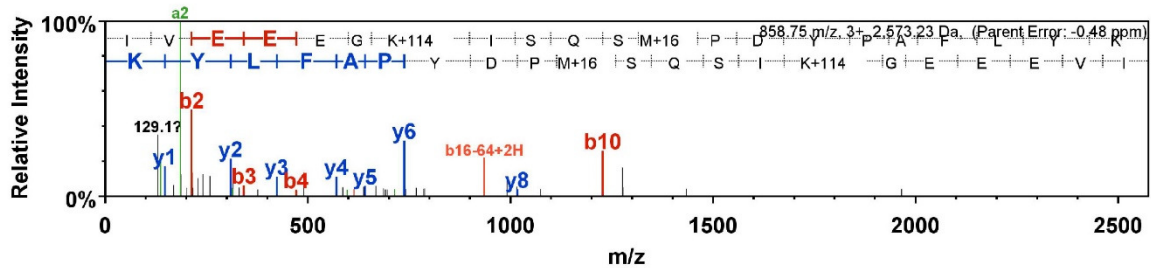

**D** AtRLP44pdead\_GFP (100%), 57,959.7 Da  
 AtRLP44pdead\_GFP  
 2 exclusive unique peptides, 4 exclusive unique spectra, 200 total spectra, 261/523 amino acids (50% coverage)

|             |             |            |            |            |
|-------------|-------------|------------|------------|------------|
| MTRSHRLLLL  | LLLIFQTAQR  | LTTADPNDEA | CLKNLRQNLE | DPASNLRNWT |
| NSVFSNPPCSG | FTSYLPGATC  | NNGRIYKLSL | TNLSLRGSIS | PFLSNCTNLQ |
| SLDLSSNQIS  | GVIPPEIQYL  | VNLAVLNLSS | NHLSGEITPQ | LALCAYLNVI |
| DLHDNELSGQ  | IQPQLGLLAR  | LSAFDVSNNK | LSGQIPTYLS | NRTGNFPRFN |
| ASSFIGNKGL  | YGYPLQEMMM  | KSKGLSVMAI | VGIGLGSGLA | SLMISFTGVC |
| LWLRITAEKKI | VEEEEGKIAQA | MPDFPAFLYK | VVISMVSKGE | ELFTGVVPII |
| VELDGDVNGH  | KFSVSGEGEG  | DATYGLTLTK | FICTTGKLPV | PWPTLVTTLT |
| YGVQCFSTRYP | DHMKQHDFFK  | SAMPEGYVQE | RTIFFKDDGN | YKTRAEVKFE |
| GDTLVNRIEL  | KGIDFKEDGN  | ILGHKLEYNY | NSHNVYIMAD | KQKNGIKVNF |
| KIRHNIEDGS  | VQLADHYQQN  | TPIGDGPVLL | PDNHVLSLTS | ALSKDPNEKR |
| DHMLVLEFVT  | AAGITLGMDE  | LYK        |            |            |

**E** (K)IVEEEGKIAQAMPDFPAFLYk(V)

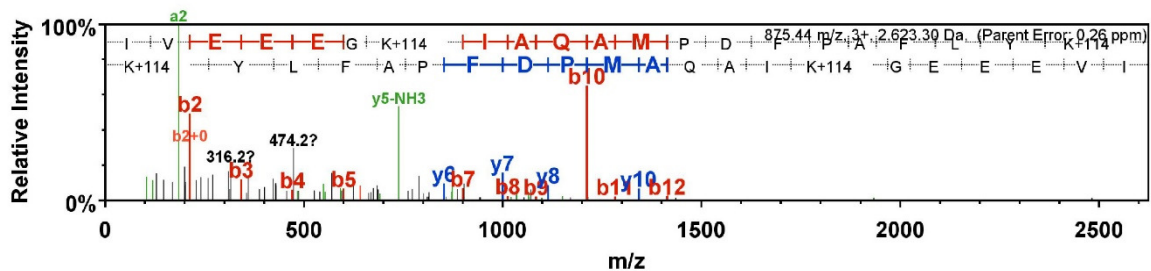

**Fig. S2. Proteomics analysis of RLP44-GFP during transient expression in *N. benthamiana* and trypsin digestion.** Peptide coverage (yellow) and modified amino acids (green) are indicated. Lower panes show spectra of peptides with phosphorylation of S268 and ubiquitination as indicated by double glycine remnant of K266. **(A)** RLP44-GFP WT peptide coverage. **(B)** RLP44-GFP WT peptide with phosphorylation of S268. **(C)** RLP44-GFP WT peptide with ubiquitination of K266. **(D)** RLP44-GFP Pdead peptide coverage. **(E)** RLP44-GFP Pdead peptide with ubiquitination of K266.

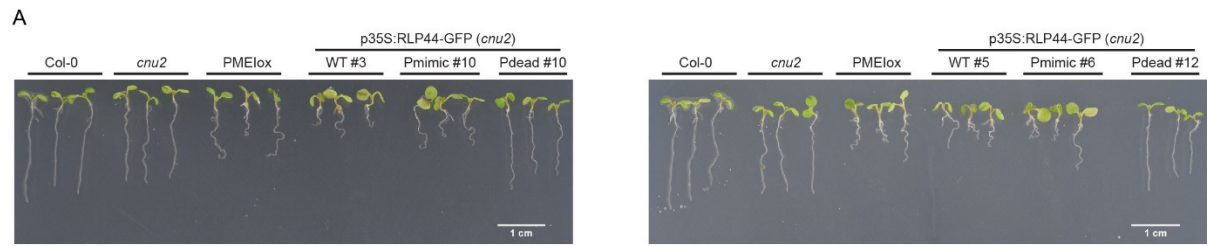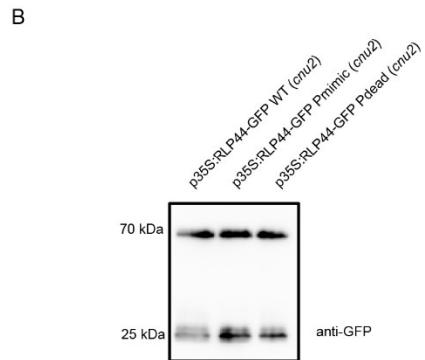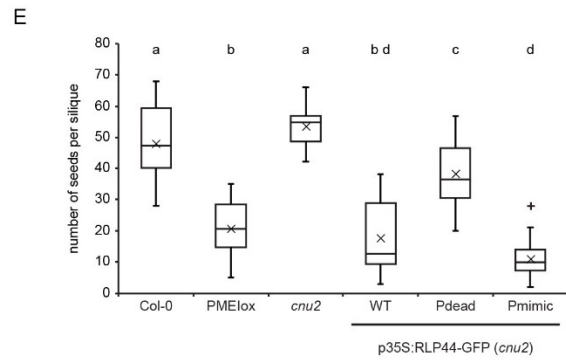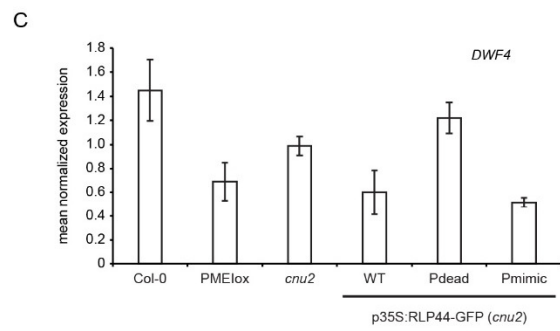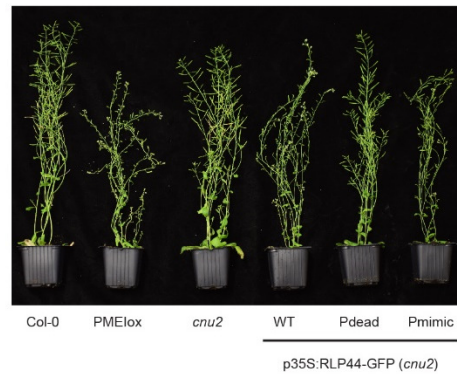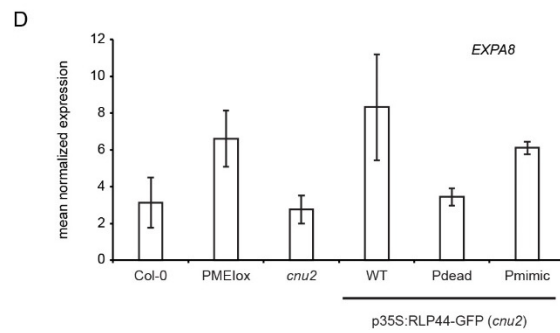

**Fig. S3. Complementation of *gnu2* by RLP44-GFP WT and RLP44-GFP Pmimic, but not by RLP44-GFP Pdead.** (A) Expression of RLP44-GFP WT and Pmimic, but not of Pdead, is able to complement the PMElox suppressor mutant *gnu2* and leads to recovery of the PMElox root waving phenotype in seedlings and contorted leaf arrangement in adult plants (see also Fig. 1). (B) Lines with comparable RLP44-GFP expression levels were selected based on Western Blot analysis with anti-GFP antiserum. (C) Quantitative Real-Time PCR analysis of the BR signalling marker gene *DWF4*, n=3. (D) Quantitative Real-Time PCR analysis of the BR signalling marker gene *EXPANSIN8*, n=3. (E) Analysis of seed yield in Col-0, PMElox, *gnu2*, and *gnu2* complementation lines. Boxes indicate range from 25<sup>th</sup> to 75<sup>th</sup> percentile, horizontal line indicates the median, whiskers indicate data points within 1.5 times the interquartile range. Markers above whiskers indicate outliers, n = 18. Lettering indicates statistically significant difference according to Tukey's post-hoc test following one-way ANOVA.

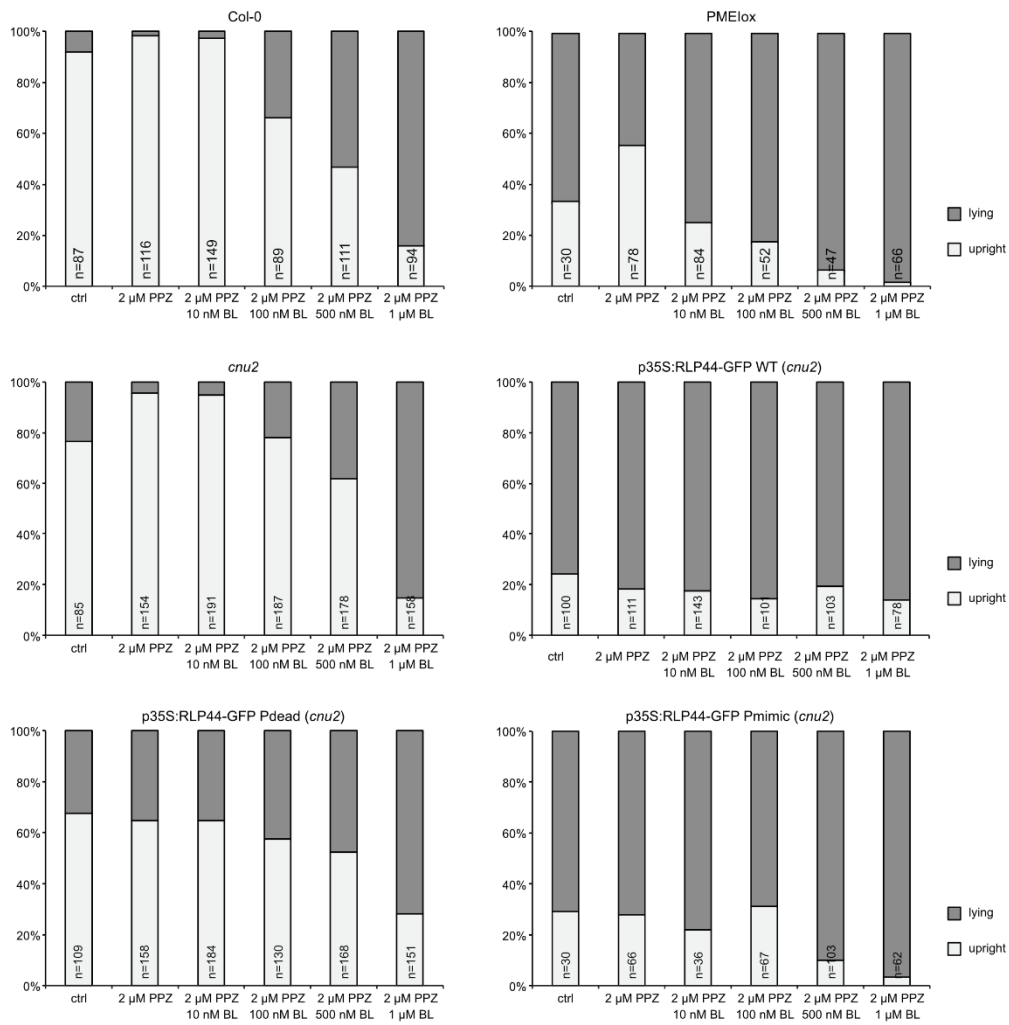

**Fig. S4. RLP44-GFP WT and Pmimic, but not RLP44-GFP Pdead restore agravitropic growth of *cnu2* along the surface of agar plates in the dark as observed in PMElox.** Endogenous brassinosteroids were depleted with PPZ treatment to test sensitivity to increasing amounts of epi-brassinolide (BL)

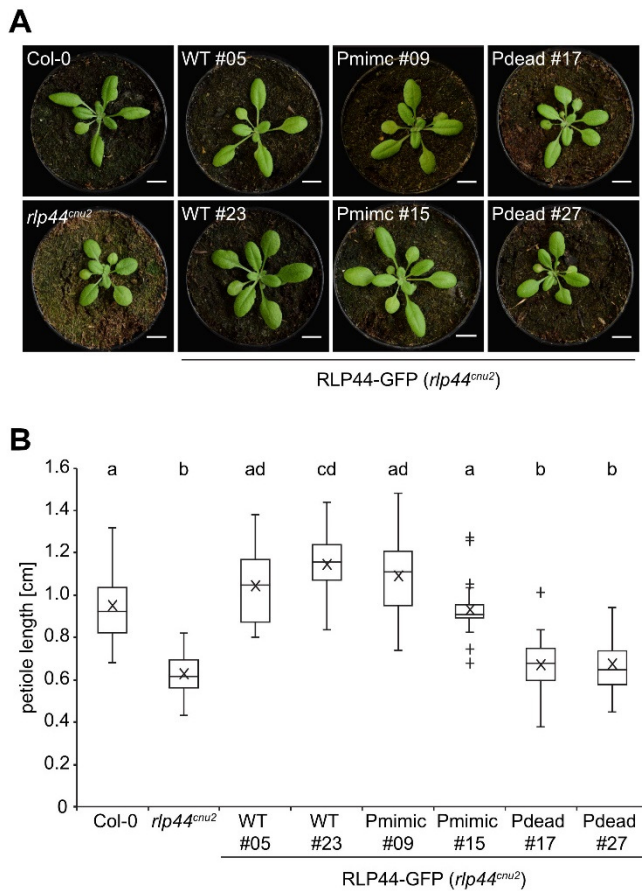

**Fig. S5. RLP44-GFP Pdead is unable to complement the petiole phenotype of *rlp44<sup>cnu2</sup>*.** (A) Rosette phenotype of Col-0, *rlp44<sup>cnu2</sup>*, and *rlp44<sup>cnu2</sup>* complementation lines in long day conditions. (B) Quantification of petiole length in lines depicted in A). Boxes indicate range from 25<sup>th</sup> to 75<sup>th</sup> percentile, horizontal line indicates the median, whiskers indicate data points within 1.5 times the interquartile range. Markers above whiskers indicate outliers, n = 21. Lettering indicates statistically significant difference according to Tukey's post-hoc test following one-way ANOVA.

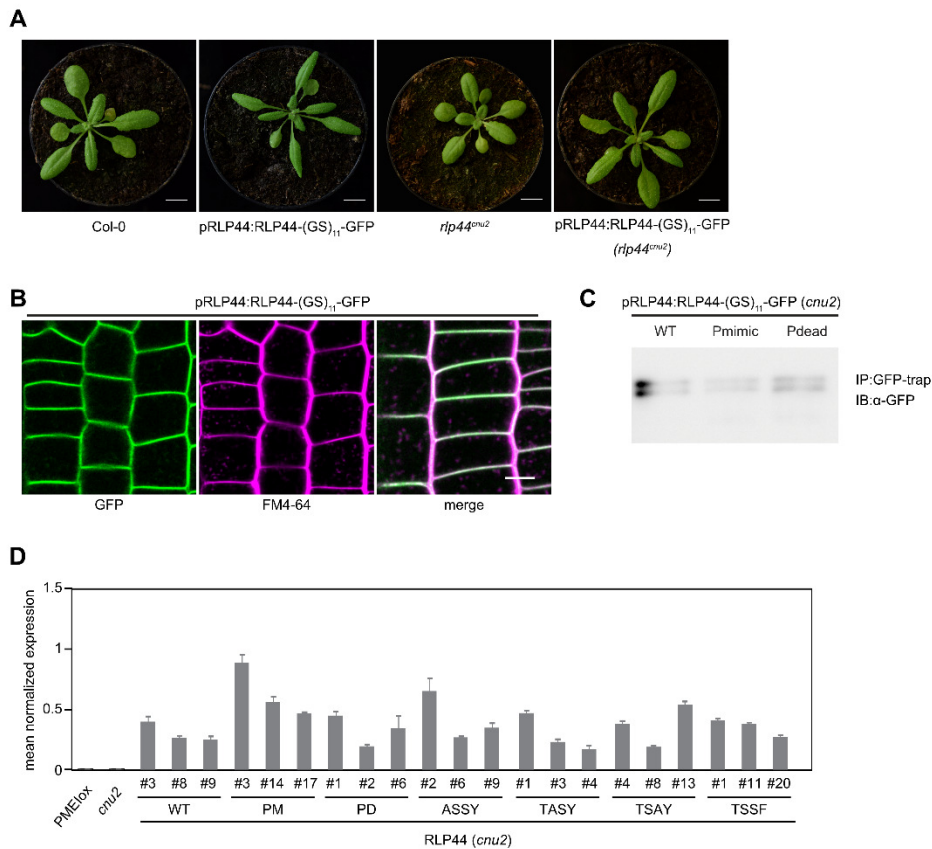

**Fig. S6. Overall charge, rather than specific phosphosites modulate RLP44 function.** (A) RLP44 overexpression phenotype (see Wolf et al., 2014) of hyperphosphorylated RLP44 under control of its own promoter. (B) Plasma membrane localization of hyperphosphorylated pRLP44:RLP44-(GS)<sub>11</sub>-GFP. (C) RLP44 Pdead and Pmimic mutants with serine-rich linker show slower migrating band similar to the WT version, suggesting linker phosphorylation. (D) Expression of *RLP44* in transgenic lines evaluated in Figure 10 using qPCR (n=3 for each line).



**Table S1.** Mutants and transgenic lines used in this study.

| Mutant/transgenic line                              |                                |
|-----------------------------------------------------|--------------------------------|
| <i>rlp44<sup>cnu2</sup></i>                         | Wolf <i>et al.</i> , 2014      |
| <i>cnu2</i>                                         | Wolf <i>et al.</i> , 2014      |
| <i>bri1-null</i>                                    | Jaillais <i>et al.</i> , 2011a |
| <i>pskr1-3 pskr2-1</i>                              | Kutschmar <i>et al.</i> , 2009 |
| <i>p35S:RLP44-GFP WT (cnu2)</i>                     | This study                     |
| <i>p35S:RLP44-GFP Pdead (cnu2)</i>                  | This study                     |
| <i>p35S:RLP44-GFP Pmimic (cnu2)</i>                 | This study                     |
| <i>p35S:RLP44-GFP WT</i>                            | This study                     |
| <i>p35S:RLP44-GFP Pdead</i>                         | This study                     |
| <i>p35S:RLP44-GFP Pmimic</i>                        | This study                     |
| <i>p35S:RLP44-GFP WT (rlp44<sup>cnu2</sup>)</i>     | This study                     |
| <i>p35S:RLP44-GFP Pdead (rlp44<sup>cnu2</sup>)</i>  | This study                     |
| <i>p35S:RLP44-GFP Pmimic (rlp44<sup>cnu2</sup>)</i> | This study                     |
| <i>p35S:RLP44-GFP WT (bri1-null)</i>                | Holzwart <i>et al.</i> , 2018  |
| <i>p35S:RLP44-GFP Pdead (bri1-null)</i>             | This study                     |
| <i>p35S:RLP44-GFP Pmimic (bri1-null)</i>            | This study                     |
| <i>p35S:RLP44-GFP WT (pskr1-3 pskr2-1)</i>          | This study                     |
| <i>p35S:RLP44-GFP Pdead (pskr1-3 pskr2-1)</i>       | This study                     |
| <i>pESTR:amiT-TML</i>                               | Gadeyne <i>et al.</i> , 2014   |
| <i>p35S:RLP44-GFP WT (pESTR:amiT-TML)</i>           | This study                     |
| <i>p35S:RLP44-GFP Pdead (pESTR:amiT-TML)</i>        | This study                     |
| <i>pRLP44:RLP44 WT (cnu2)</i>                       | This study                     |
| <i>pRLP44:RLP44 Pdead (cnu2)</i>                    | This study                     |
| <i>pRLP44:RLP44 Pmimic (cnu2)</i>                   | This study                     |
| <i>pRLP44:RLP44 T256A (cnu2)</i>                    | This study                     |
| <i>pRLP44:RLP44 S268A (cnu2)</i>                    | This study                     |
| <i>pRLP44:RLP44 S270A (cnu2)</i>                    | This study                     |
| <i>pRLP44:RLP44 Y274F (cnu2)</i>                    | This study                     |
| <i>pRLP44:RLP44-(GS)11-GFP</i>                      | Holzwart <i>et al.</i> , 2018  |
| <i>pRLP44:RLP44-(GS)11-GFP WT (cnu2)</i>            | This study                     |
| <i>pRLP44:RLP44-(GS)11-GFP Pmimic (cnu2)</i>        | This study                     |
| <i>pRLP44:RLP44-(GS)11-GFP (Pdead (cnu2))</i>       | This study                     |

**Table S2.** Oligonucleotides used in this study

| Primer No. | Primer name              | Sequence (5' → 3')                                                                     | target    |
|------------|--------------------------|----------------------------------------------------------------------------------------|-----------|
| SW660      | RLP44_GW_L               | GGGGACAAGTTTGTACA <del>AAAAAGCAGGCTATGA</del><br>CAAGGAGTCACCGTTAC                     | At3g49750 |
| SW670      | RLP_GW_WToY_R            | GGGGACCACTTTGTACAAGAAAGCTGGGTGTAA<br>TCAGGCATAGATTGAC                                  | At3g49750 |
| SW666      | RLP44_SDMT25_6A_F        | gtttatggttgaggattgctgagaagaagattgtg                                                    | At3g49750 |
| SW667      | RLP44_SDMT25_6A_R        | caacaatcttctcagcaatcctcaaccataaac                                                      | At3g49750 |
| SW668      | RLP_S268,270A_Y274F_Rneu | GGGGACCACTTTGTACAAGAAAGCTGGGT <del>agaaa</del><br>tcaggcatagcttgagcaatcttaccttcttcaac  | At3g49750 |
| SW672      | RLP44_SDMT25_6E_F        | GAGGATTGAAGAGAAGAAGATTGTTGAAGAAG                                                       | At3g49750 |
| SW673      | RLP44_SDMT25_6E_R        | ATCTTCTTCTCTTCAATCCTCAACCATAAAC                                                        | At3g49750 |
| SW671      | RLP_SSY-EEE_R            | GGGGACCACTTTGTACAAGAAAGCTGGGT <del>agaaa</del><br>tcaggcatagattgactaatc                | At3g49750 |
| SW661      | RLP44_Y274F_R            | GGGGACCACTTTGTACAAGAAAGCTGGGT <del>tttcatc</del><br>aggcatttctgttcaatcttaccttcttcaac   | At3g49750 |
| SW662      | RLP44_S268A_R            | GGGGACCACTTTGTACAAGAAAGCTGGGT <del>tagtaat</del><br>caggcatagcttgactaatcttaccttctc     | At3g49750 |
| SW663      | RLP44_S270A_R            | GGGGACCACTTTGTACAAGAAAGCTGGGT <del>tagtaat</del><br>caggcatagattgagcaatcttaccttcttcaac | At3g49750 |
| SW2446     | RLP44-if-f               | tgAagcttGGTCTCaGGCTcAATGACAAGGAGTCAC<br>CGG                                            | At3g49750 |
| SW2447     | RLP44WT-if-r             | atGGCACCCGCCCTGCTCcGTAATCAGGCATAG<br>ATTG                                              | At3g49750 |
| SW2448     | GAGAGA-GFP-if-f          | gGAGCAGGGGCGGGTGCC                                                                     | GFP       |
| SW2449     | GAGAGA-GFP-if-r          | cgaGAATTcGGTCTCaCTGAttactgtacagctcgtcc                                                 | GFP       |
| SW2450     | RLP44TS-AY-if-r          | atGGCACCCGCCCTGCTCcGTAATCAGGCATAG<br>cTTG                                              | At3g49750 |
| SW2452     | RLP44TS-SF-if-r          | atGGCACCCGCCCTGCTCcGaAATCAGGCATAG<br>ATTG                                              | At3g49750 |
| SW2454     | RLP44AA-AF-if-r          | atGGCACCCGCCCTGCTCcGaAATCAGGCATAG<br>cTTG                                              | At3g49750 |
| SW2455     | RLP44EE-EE-if-r          | atGGCACCCGCCCTGCTCccttATCAGGCATttcTT<br>G                                              | At3g49750 |
| SW3000     | RLP44prom_F              | GGGGACAAGTTTGTACA <del>AAAAAGCAGGCTTTTG</del><br>CGATATTTTTGGCTGTC                     | At3g49750 |
| SW3001     | RLP44stop_R              | GGGGACCACTTTGTACAAGAAAGCTGGGTTTTA<br>GTAATCAGGCATAGATTGACT                             | At3g49750 |
| SW3002     | RLP44_TASY_stop_R        | GGGGACCACTTTGTACAAGAAAGCTGGGTTTTA<br>GTAATCAGGCATAGATTG                                | At3g49750 |
| SW3003     | RLP44_PM_stop_R          | GGGGACCACTTTGTACAAGAAAGCTGGGTTTTA<br>TTCATCAGGCATTTCTTGTTCAATCTT                       | At3g49750 |
| SW3004     | RLP44_PD_stop_R          | GGGGACCACTTTGTACAAGAAAGCTGGGTTTTA<br>GAAATCAGGCATAGCTTGAGCAATCTT                       | At3g49750 |
| SW3005     | RLP44_TSAY_stop_R        | GGGGACCACTTTGTACAAGAAAGCTGGGTTTTA<br>GTAATCAGGCATAGCTTGACTAATCTT                       | At3g49750 |
| SW3006     | RLP44_TSSF_stop_R        | GGGGACCACTTTGTACAAGAAAGCTGGGTTTTA<br>GAAATCAGGCATAGATTGACTAATC                         | At3g49750 |
| SW1179     | RLP44_GG_F               | AACAGGTCTCAGGCTCAATGACAAGGAGTCACC<br>GGTTA                                             | At3g49750 |
| SW1205     | RLP44_GG_R               | AACAGGTCTCACTGAGTAATCAGGCATAGATTG<br>AC                                                | At3g49750 |
| SW1367     | RLP44_PD_GG_C_R          | AACAGGTCTCACTGAGAAATCAGGCATAGCTTG                                                      | At3g49750 |

|        |                    |                                   |           |
|--------|--------------------|-----------------------------------|-----------|
| SW1368 | RLP44 PM GG<br>C R | AACAGGTCTCACTGATTCATCAGGCATTTCTTG | At3g49750 |
| SW503  | RLP44-<br>4 CAPS F | AATCTACAAACTCTCACTCAC             | At3g49750 |
| SW504  | RLP44-<br>4 CAPS R | CTGACCCGGATAATTCGTTATC            | At3g49750 |
| SW1377 | GK-O8409           | ATATTGACCATCATACTCATTGC           |           |
| SW1378 | GK-134E10 F        | TAGCGGAAACAAAATCAGTGG             | At4g39400 |
| SW1379 | GK-134E10 R        | TCGTTCCATTGAAGAGATTGG             | At4g39400 |
| SW1754 | pskr1-3 F          | CTCGCTTTCTGGTATGACGAG             | At2g02220 |
| SW1746 | pskr1-3 R          | TCCGAAACTATACACATCGCC             | At2g02220 |
| SW1984 | pskr2-1 F          | TTCTTAGACTGTTTGGCTCGG             | At5g53890 |
| SW1985 | pskr2-1 R          | GCGTTACAAACATGCAACAAG             | At5g53890 |
| SW230  | LBb1.3             | ATTTTGCCGATTTTCGGAAC              |           |
| SW905  | attB1              | ACAAGTTTGTACAAAAAGCAGGCT          |           |
| SW906  | attB2              | ACCACTTTGTACAAGAAAGCTGGGT         |           |
| SW1202 | pGG-Bdummy F       | GTATTCAGTCGACTGGTACCAAC           |           |
| SW1137 | pGGA/C000 R        | CAGATTGTACTGAGAGTGCACC            |           |
| SW521  | AtEXP8 F           | CCGAAATAACTAACCCCTCCTC            | At2g40610 |
| SW522  | AtEXP8 R           | TAGCCACAAGCTCCGCCAT               | At2g40610 |
| SW803  | DWF4 F             | CAACAGCAAACAACGGAGCG              | At3g50660 |
| SW804  | DWF4 R             | TCTGAACCAGCACATAGCCTTG            | At3g50660 |
| SW1015 | Clath F            | TCGATTGCTTGGTTTGAAGAT             | At1g10730 |
| SW1016 | Clath R            | GCACTTAGCGTGGACTCTGTTTGC          | At1g10730 |
| SW612  | RLP44COD2 F        | TCAGATTCCGCAGCAATTAG              | At3g49750 |
| SW613  | RLP44COD2 R        | TCCTGCAACGGATAACCATA              | At3g49750 |
|        | ACT2 F             | CAGTGTCTGGATCGGTGGTT              | At3g18780 |
|        | ACT2 R             | TGAACGATTCCTGGACCTGC              | At3g18780 |

**Table S3.** Overview of constructs generated with GreenGate cloning.

| <b>pSW362</b>       |                         | <b>pRLP44:RLP44-(GS)<sub>11</sub>-GFP WT</b>     |                           |                        |
|---------------------|-------------------------|--------------------------------------------------|---------------------------|------------------------|
|                     | <i>Name</i>             | <i>Internal name</i>                             | <i>Source</i>             | <i>Primers</i>         |
| "Promoter" module   | pRLP44                  | pSW299                                           | Holzward et al., 2018     |                        |
| "N-tag" module      | B-dummy                 | pGGB003                                          | Lampropoulos et al., 2013 |                        |
| "CDS" module        | RLP44                   | pSW334                                           | Holzward et al., 2018     | SW1179-1205            |
| "C-tag" module      | (GS) <sub>11</sub> -GFP | PGGD001                                          | Lampropoulos et al., 2013 |                        |
| "Terminator" module | tUBQ10                  | pGGE009                                          | Lampropoulos et al., 2013 |                        |
| "Resistance" module | SulfR                   | pGGF006                                          | Lampropoulos et al.,2013  |                        |
| Destination vector  |                         | pGGZ0001                                         | Lampropoulos et al.,2013  |                        |
| <b>pSW567</b>       |                         | <b>pRLP44:RLP44-(GS)<sub>11</sub>-GFP Pmimic</b> |                           |                        |
|                     | <i>Name</i>             | <i>Internal name</i>                             | <i>Source</i>             | <i>Primers</i>         |
| "Promoter" module   | pRLP44                  | pSW299                                           | Holzward et al., 2018     |                        |
| "N-tag" module      | B-dummy                 | pGGB003                                          | Lampropoulos et al., 2013 |                        |
| "CDS" module        | RLP44pmimic             | pSW519                                           | This study                | SW1179-1368            |
| "C-tag" module      | (GS) <sub>11</sub> -GFP | PGGD001                                          | Lampropoulos et al., 2013 |                        |
| "Terminator" module | tUBQ10                  | pGGE009                                          | Lampropoulos et al., 2013 |                        |
| "Resistance" module | SulfR                   | pGGF006                                          | Lampropoulos et al.,2013  |                        |
| Destination vector  |                         | pGGZ0001                                         | Lampropoulos et al.,2013  |                        |
| <b>pSW566</b>       |                         | <b>pRLP44:RLP44-(GS)<sub>11</sub>-GFP Pdead</b>  |                           |                        |
|                     | <i>Name</i>             | <i>Internal name</i>                             | <i>Source</i>             | <i>Primers</i>         |
| "Promoter" module   | pRLP44                  | pSW299                                           | Holzward et al., 2018     |                        |
| "N-tag" module      | B-dummy                 | pGGB003                                          | Lampropoulos et al., 2013 |                        |
| "CDS" module        | RLP44pdead              | pSW518                                           | This study                | SW1179-1367            |
| "C-tag" module      | (GS) <sub>11</sub> -GFP | PGGD001                                          | Lampropoulos et al., 2013 |                        |
| "Terminator" module | tUBQ10                  | pGGE009                                          | Lampropoulos et al., 2013 |                        |
| "Resistance" module | SulfR                   | pGGF006                                          | Lampropoulos et al.,2013  |                        |
| Destination vector  |                         | pGGZ0001                                         | Lampropoulos et al.,2013  |                        |
| <b>pSW1027</b>      |                         | <b>pRLP44:RLP44-GAGAGA-GFP WT</b>                |                           |                        |
| "Promoter" module   | pRLP44                  | pSW299                                           | Holzward et al., 2018     |                        |
| "N-tag" module      | B-dummy                 | pGGB003                                          | Lampropoulos et al., 2013 |                        |
| "CDS" module        | RLP44-GAGAGA-GFP        | pSW999                                           | This study                | SW2446-2449            |
| "C-tag" module      | D-dummy                 | pGGD002                                          | Lampropoulos et al., 2013 |                        |
| "Terminator" module | tUBQ10                  | pGGE009                                          | Lampropoulos et al., 2013 |                        |
| "Resistance" module | SulfR                   | pGGF006                                          | Lampropoulos et al.,2013  |                        |
| Destination vector  |                         | pGGZ0001                                         | Lampropoulos et al.,2013  |                        |
| <b>pSW1019</b>      |                         | <b>pRLP44:RLP44-GAGAGA-GFP Pmimic</b>            |                           |                        |
| "Promoter" module   | pRLP44                  | pSW299                                           | Holzward et al., 2018     |                        |
| "N-tag" module      | B-dummy                 | pGGB003                                          | Lampropoulos et al., 2013 |                        |
| "CDS" module        | RLP44-GAGAGA-GFP Pmimic | pSW1018                                          | This study                | SW2446-2455, 2448+2449 |
| "C-tag" module      | D-dummy                 | pGGD002                                          | Lampropoulos et al., 2013 |                        |
| "Terminator" module | tUBQ10                  | pGGE009                                          | Lampropoulos et al., 2013 |                        |
| "Resistance" module | SulfR                   | pGGF006                                          | Lampropoulos et al.,2013  |                        |
| Destination vector  |                         | pGGZ0001                                         | Lampropoulos et al.,2013  |                        |
| <b>pSW1017</b>      |                         | <b>pRLP44:RLP44-GAGAGA-GFP Pdead</b>             |                           |                        |
| "Promoter" module   | pRLP44                  | pSW299                                           | Holzward et al., 2018     |                        |
| "N-tag" module      | B-dummy                 | pGGB003                                          | Lampropoulos et al., 2013 |                        |

|                     |                                     |          |                           |                        |
|---------------------|-------------------------------------|----------|---------------------------|------------------------|
| “CDS” module        | RLP44-GAGAGA-GFP Pdead              | pSW1007  | This study                | SW2446+2454, 2448+2449 |
| “C-tag” module      | D-dummy                             | pGGD002  | Lampropoulos et al., 2013 |                        |
| “Terminator” module | tUBQ10                              | pGGE009  | Lampropoulos et al., 2013 |                        |
| “Resistance” module | SulfR                               | pGGF006  | Lampropoulos et al.,2013  |                        |
| Destination vector  |                                     | pGGZ0001 | Lampropoulos et al.,2013  |                        |
|                     |                                     |          |                           |                        |
| <b>pSW1026</b>      | <b>pRLP44:RLP44-GAGAGA-GFP ASSY</b> |          |                           |                        |
| “Promoter” module   | pRLP44                              | pSW299   | Holzwardt et al., 2018    |                        |
| “N-tag” module      | B-dummy                             | pGGB003  | Lampropoulos et al., 2013 |                        |
| “CDS” module        | RLP44-GAGAGA-GFP ASSY               | pSW1000  | This study                | SW2446+2447, 2448+2449 |
| “C-tag” module      | D-dummy                             | pGGD002  | Lampropoulos et al., 2013 |                        |
| “Terminator” module | tUBQ10                              | pGGE009  | Lampropoulos et al., 2013 |                        |
| “Resistance” module | SulfR                               | pGGF006  | Lampropoulos et al.,2013  |                        |
| Destination vector  |                                     | pGGZ0001 | Lampropoulos et al.,2013  |                        |
|                     |                                     |          |                           |                        |
| <b>pSW1028</b>      | <b>pRLP44:RLP44-GAGAGA-GFP TASY</b> |          |                           |                        |
| “Promoter” module   | pRLP44                              | pSW299   | Holzwardt et al., 2018    |                        |
| “N-tag” module      | B-dummy                             | pGGB003  | Lampropoulos et al., 2013 |                        |
| “CDS” module        | RLP44-GAGAGA-GFP TASY               | pSW1002  | This study                | SW2446+2447, 2448+2449 |
| “C-tag” module      | D-dummy                             | pGGD002  | Lampropoulos et al., 2013 |                        |
| “Terminator” module | tUBQ10                              | pGGE009  | Lampropoulos et al., 2013 |                        |
| “Resistance” module | SulfR                               | pGGF006  | Lampropoulos et al.,2013  |                        |
| Destination vector  |                                     | pGGZ0001 | Lampropoulos et al.,2013  |                        |
|                     |                                     |          |                           |                        |
| <b>pSW1014</b>      | <b>pRLP44:RLP44-GAGAGA-GFP TSAY</b> |          |                           |                        |
| “Promoter” module   | pRLP44                              | pSW299   | Holzwardt et al., 2018    |                        |
| “N-tag” module      | B-dummy                             | pGGB003  | Lampropoulos et al., 2013 |                        |
| “CDS” module        | RLP44-GAGAGA-GFP TSAY               | pSW1004  | This study                | SW2446+2450, 2448+2449 |
| “C-tag” module      | D-dummy                             | pGGD002  | Lampropoulos et al., 2013 |                        |
| “Terminator” module | tUBQ10                              | pGGE009  | Lampropoulos et al., 2013 |                        |
| “Resistance” module | SulfR                               | pGGF006  | Lampropoulos et al.,2013  |                        |
| Destination vector  |                                     | pGGZ0001 | Lampropoulos et al.,2013  |                        |
|                     |                                     |          |                           |                        |
| <b>pSW1015</b>      | <b>pRLP44:RLP44-GAGAGA-GFP TSSF</b> |          |                           |                        |
| “Promoter” module   | pRLP44                              | pSW299   | Holzwardt et al., 2018    |                        |
| “N-tag” module      | B-dummy                             | pGGB003  | Lampropoulos et al., 2013 |                        |
| “CDS” module        | RLP44-GAGAGA-GFP TSSF               | pSW1005  | This study                | SW2446+2452, 2448+2449 |
| “C-tag” module      | D-dummy                             | pGGD002  | Lampropoulos et al., 2013 |                        |
| “Terminator” module | tUBQ10                              | pGGE009  | Lampropoulos et al., 2013 |                        |
| “Resistance” module | SulfR                               | pGGF006  | Lampropoulos et al.,2013  |                        |
| Destination vector  |                                     | pGGZ0001 | Lampropoulos et al.,2013  |                        |
